# Supplementary material for: A DNA-Methylation-Driven Genes Based Prognostic Signature Reveals Immune Microenvironment in Pancreatic Cancer
Source: Front Immunol. 2022 Feb 10;13:803962. doi: 10.3389/fimmu.2022.803962 (PMC8866195; doi:10.3389/fimmu.2022.803962)
Supplement: Supplementary Table 5 — Candidate chemo and targeted drugs identified by the GDSC database in TCGA-PAAD and ICGC-PACA-AU (seq) datasets. [file Table_5.xls]

## Sheet: Sheet1_TCGA-PAAD
Favored subgroup	Drug	P.value
High risk-score	Bicalutamide	1.73e-09
	Paclitaxel	2.12e-09
	Lapatinib	1.68e-07
	Dasatinib	4.74e-06
	Bryostatin.1	1.14e-05
	Thapsigargin	1.98e-05
	Bortezomib	0.00041227
	Bleomycin	0.000855874
	Docetaxel	0.000911076
	Rapamycin	0.00215593
	Pyrimethamine	0.00332868
	Cyclopamine	0.00348576
	Epothilone.B	0.00824106
	Sorafenib	0.0109855
	Doxorubicin	0.0123864
	Obatoclax.Mesylate	0.016022
	Parthenolide	0.0216216
	Erlotinib	0.0370877
	Roscovitine	0.0490805
Low risk-score	Axitinib	3.74e-12
	Lenalidomide	2.9e-10
	Nilotinib	4.86e-07
	Temsirolimus	8.47e-07
	ATRA	1.57e-06
	Vorinostat	4.15e-05
	Methotrexate	0.00133023
	Camptothecin	0.0024654
	Elesclomol	0.0310796

## Sheet: Sheet2_ICGC-PACA-AU (seq)
Favored subgroup	Drug	P.value
High risk-score	Bleomycin	2.88e-05
	Mitomycin.C	4.82e-05
	Doxorubicin	0.000142197
	Thapsigargin	0.000327142
	Bosutinib	0.00118441
	Docetaxel	0.00260312
	Paclitaxel	0.00790507
	Gemcitabine	0.00845389
	Midostaurin	0.00845389
	Epothilone.B	0.0106468
	Tipifarnib	0.0129053
	Etoposide	0.02366
	Pazopanib	0.0257925
	Dasatinib	0.0280835
	Salubrinal	0.0369748
	Bexarotene	0.0411231
Low risk-score	Metformin	0.0297031
	AKT.inhibitor.VIII	0.0400522
